# Supplementary material
Source: PubMed Central journal article supplement (PMC3370583)
Supplement: supp_80.6.2186_IAI-IAI00037-12-s01.pdf [file supp_80.6.2186_IAI-IAI00037-12-s01.pdf]

## Supplementary Tables

**Supplementary Table 1.**

List of abbreviations and explanations of tested *S. aureus* and *S. pneumoniae* virulence factors.

| <i>S. aureus</i> (n=40)          |                                                | <i>S. pneumoniae</i> (n=18) |                                                              |
|----------------------------------|------------------------------------------------|-----------------------------|--------------------------------------------------------------|
| Abbreviation                     | Explanation                                    | Abbreviation                | Explanation                                                  |
| <b><math>\alpha</math>-toxin</b> | Alpha- toxin (alpha-hemolysin)                 | <b>CbpA</b>                 | Pneumococcal cell-surface proteins choline binding protein A |
| <b>CHIPS</b>                     | Chemotaxis inhibitory protein                  | <b>ENO</b>                  | Enolase                                                      |
| <b>ClfA</b>                      | Clumping factor A                              | <b>Hyl</b>                  | Hyaluronidase                                                |
| <b>ClfB</b>                      | Clumping factor B                              | <b>IgA-1</b>                | IgA-1 protease                                               |
| <b>Efb</b>                       | Extracellular fibrinogen binding protein       | <b>NanA</b>                 | Neuraminidase A                                              |
| <b>ET (A, B)</b>                 | Exfoliative toxins (A,B)                       | <b>PbdB</b>                 | Double mutant of pneumolysin                                 |
| <b>FnbpA</b>                     | Fibronectin-binding protein A                  | <b>Pht-D</b>                | Pneumococcal histidine triad protein D                       |
| <b>FnbpB</b>                     | Fibronectin-binding protein B                  | <b>Pht-E</b>                | Pneumococcal histidine triad protein E                       |
| <b>HlgB</b>                      | Gamma hemolysin                                | <b>Pilus-A</b>              | Pilus hair like structure A                                  |
| <b>IsdA</b>                      | Iron-responsive surface determinant A          | <b>PLY</b>                  | Pneumolysin                                                  |
| <b>IsdH</b>                      | Iron-responsive surface determinant H          | <b>PpmA</b>                 | Putative protease maturation protein A                       |
| <b>LuK D, E, F, S</b>            | Leukocidin (D, E, F, S)                        | <b>PsaA</b>                 | Pneumococcal surface adhesin A                               |
| <b>SasG</b>                      | <i>S. aureus</i> surface protein G             | <b>PspA</b>                 | Pneumococcal surface protein A                               |
| <b>SCIN</b>                      | Staphylococcal complement inhibitor            | <b>SlrA</b>                 | Streptococcal lipoprotein rotamase A                         |
| <b>Sdr D, E</b>                  | Serine–aspartate dipeptide repeat protein D, E | <b>Sp0189</b>               | <i>Streptococcus pneumoniae</i> protein 0189                 |
| <b>SE -X</b>                     | Staphylococcal enterotoxins                    | <b>Sp0376</b>               | <i>S. Pneumoniae</i> protein 0376                            |
| <b>SSL</b>                       | Staphylococcal superantigen-like               | <b>Sp1633</b>               | <i>S. Pneumoniae</i> protein 1633                            |
| <b>TSST-1</b>                    | Toxic shock syndrome toxin 1                   | <b>Sp1651</b>               | <i>S. Pneumoniae</i> protein 1651                            |

**Supplementary Table 2.**

Interquartile range of titers (in MFI) to pneumococcal proteins and percentage of children responsive to each protein at the age of 12 and 24 months.

| Proteins | 12 months (n=56)      |        |          | Responsive<br>in <sup>A</sup> (%) | 24 months (n=56) |        |          | Responsive<br>in <sup>A</sup> (%) |
|----------|-----------------------|--------|----------|-----------------------------------|------------------|--------|----------|-----------------------------------|
|          | 25 <sup>th</sup> (Q1) | Median | 75th(Q3) |                                   | 25th(Q1)         | Median | 75th(Q3) |                                   |
| PLY      | 1995                  | 3859   | 6986     | 100                               | 6616             | 10116  | 14263    | 100                               |
| CbpA     | 780                   | 9895   | 22362    | 100                               | 22375            | 24667  | 25445    | 100                               |
| PspA     | 80                    | 379    | 1074     | 90                                | 497              | 1038   | 5726     | 94                                |
| PpmA     | 0                     | 477    | 3259     | 64                                | 775              | 3860   | 10579    | 96                                |
| SlrA     | 0                     | 16     | 305      | 58                                | 169              | 425    | 1108     | 100                               |
| PsaA     | 9805                  | 16144  | 22050    | 100                               | 17447            | 21977  | 23359    | 100                               |
| Hyl      | 604                   | 7544   | 15813    | 94                                | 13390            | 20532  | 23366    | 100                               |
| NanA     | 102                   | 326    | 1217     | 94                                | 974              | 2177   | 3124     | 100                               |
| Pht-E    | 76                    | 891    | 6354     | 90                                | 4380             | 11469  | 17470    | 100                               |
| Pht-D    | 1760                  | 9227   | 21431    | 100                               | 20325            | 24182  | 24852    | 100                               |
| Pilus-A  | 0                     | 0      | 0        | 10                                | 1                | 18     | 41       | 87                                |
| ENO      | 0                     | 41     | 219      | 75                                | 142              | 251    | 368      | 100                               |
| IgA-1    | 6                     | 63     | 236      | 81                                | 103              | 423    | 2321     | 100                               |
| Sp0189   | 905                   | 3161   | 6483     | 100                               | 5923             | 9168   | 11211    | 100                               |
| Sp0376   | 43                    | 75     | 142      | 94                                | 105              | 157    | 254      | 100                               |
| Sp1633   | 1012                  | 2150   | 2952     | 100                               | 2594             | 3019   | 4501     | 100                               |
| Sp1651   | 52                    | 126    | 330      | 92                                | 104              | 167    | 299      | 100                               |

Median antibody titers are given. <sup>A</sup> Defined as percentage of children with measurable titers (MFI>0). n.a.: not applicable

**Supplementary Table 3.**

Interquartile range of titers (in MFI) to *S. aureus* proteins and percentage of children responsive to each protein at the age of 12 and 24 months.

| Proteins        | 12 months (n=60)      |        |          | Responsive<br>in <sup>A</sup> (%) | 24 months (n=60) |        |          | Responsive<br>in <sup>A</sup> (%) |
|-----------------|-----------------------|--------|----------|-----------------------------------|------------------|--------|----------|-----------------------------------|
|                 | 25 <sup>th</sup> (Q1) | Median | 75th(Q3) |                                   | 25th(Q1)         | Median | 75th(Q3) |                                   |
| ClfA            | 190                   | 443    | 1651     | 100                               | 88               | 365    | 1480     | 95                                |
| ClfB            | 108                   | 393    | 2506     | 100                               | 35               | 480    | 2308     | 78                                |
| SasG            | 52                    | 85     | 194      | 100                               | 0                | 0      | 38       | 37                                |
| IsdA            | 155                   | 845    | 1845     | 100                               | 213              | 767    | 1545     | 87                                |
| IsdH            | 132                   | 210    | 844      | 100                               | 0                | 74     | 698      | 68                                |
| FnbpA           | 98                    | 152    | 245      | 100                               | 0                | 73     | 247      | 68                                |
| FnbpB           | 203                   | 297    | 502      | 100                               | 59               | 167    | 766      | 83                                |
| SdrD            | 42                    | 79     | 136      | 100                               | 0                | 0      | 58       | 32                                |
| SdrE            | 48                    | 68     | 459      | 100                               | 0                | 27     | 488      | 53                                |
| SEA             | 118                   | 156    | 264      | 100                               | 0                | 69     | 276      | 72                                |
| SEB             | 37                    | 54     | 102      | 100                               | 0                | 0      | 0        | 18                                |
| SEC             | 149                   | 242    | 705      | 100                               | 0                | 64     | 2244     | 63                                |
| SED             | 124                   | 211    | 354      | 100                               | 39               | 93     | 219      | 80                                |
| SEE             | 34                    | 49     | 60       | 100                               | 0                | 0      | 0        | 17                                |
| SEG             | 60                    | 74     | 111      | 100                               | 0                | 4      | 52       | 52                                |
| SEH             | 39                    | 46     | 82       | 100                               | 0                | 0      | 0        | 18                                |
| SEI             | 47                    | 62     | 85       | 100                               | 0                | 0      | 2        | 25                                |
| SEJ             | 206                   | 347    | 523      | 100                               | 95               | 198    | 412      | 87                                |
| SEM             | 51                    | 66     | 95       | 100                               | 0                | 0      | 0        | 23                                |
| SEN             | 24                    | 31     | 41       | 100                               | 0                | 0      | 0        | 13                                |
| SEO             | 60                    | 75     | 89       | 100                               | 0                | 0      | 14       | 37                                |
| SEQ             | 20                    | 30     | 44       | 100                               | 0                | 0      | 0        | 7                                 |
| SER             | 23                    | 32     | 44       | 100                               | 0                | 0      | 0        | 8                                 |
| SSL-1           | 68                    | 160    | 1220     | 100                               | 0                | 51     | 986      | 62                                |
| SSL-3           | n.a.                  | n.a.   | n.a.     | 100                               | 0                | 63     | 2576     | 55                                |
| SSL-5           | 95                    | 496    | 1500     | 100                               | 16               | 553    | 1806     | 82                                |
| SSL-9           | n.a.                  | n.a.   | n.a.     | 100                               | 158              | 2124   | 6996     | 90                                |
| SSL-11          | 47                    | 66     | 122      | 100                               | 0                | 0      | 55       | 38                                |
| TSST-1          | 136                   | 209    | 630      | 100                               | 0                | 42     | 154      | 63                                |
| ETA             | 96                    | 142    | 220      | 100                               | 0                | 0      | 11       | 30                                |
| ETB             | 27                    | 37     | 48       | 100                               | 0                | 0      | 0        | 45                                |
| LukD            | 324                   | 1741   | 4685     | 100                               | 197              | 1321   | 5138     | 95                                |
| LukE            | 824                   | 3257   | 8652     | 100                               | 595              | 2686   | 10381    | 90                                |
| LukS            | 908                   | 3766   | 5493     | 100                               | 669              | 2400   | 6194     | 0                                 |
| LukF            | 216                   | 316    | 535      | 100                               | 194              | 273    | 565      | 97                                |
| HlgB            | n.a.                  | n.a.   | n.a.     | 100                               | 446              | 2689   | 7362     | 95                                |
| $\alpha$ -toxin | 436                   | 5093   | 9454     | 100                               | 915              | 5931   | 11053    | 93                                |
| SCIN            | 146                   | 1839   | 4389     | 100                               | 24               | 1292   | 5513     | 83                                |
| CHIPS           | 108                   | 1362   | 8706     | 100                               | 0                | 2148   | 10329    | 73                                |
| Efb             | 296                   | 484    | 1451     | 100                               | 214              | 649    | 3537     | 95                                |

Median antibody titers are given. <sup>A</sup> Defined as percentage of children with measurable titers (MFI>0). n.a.: not applicable
